# Supplementary material for: High Resolution Genetic and Physical Mapping of a Major Powdery Mildew Resistance Locus in Barley
Source: Front Plant Sci. 2019 Feb 14;10:146. doi: 10.3389/fpls.2019.00146 (PMC6382739; doi:10.3389/fpls.2019.00146)
Supplement: Supplementary file 1 [file Table_1.xlsx]

## Sheet: Sheet1
List of the identified resistant barley accessions, available in Gatersleben genebank, phenotyped by seven modern, highly virulent powdery mildew isolates.
		Powdery mildew isolates
	Resistant accessions1	78P	D12-12	CH4.8	35	69	148	289
1	Res_11	2.5	24.0625	2.5	38	47.375	38	47.375
2	Res_40	2.5	3.58333	2.5	2.5	2.5	2.5	2.5
3	Res_42	2.5	2.5	2.5	2.5	2.5	2.5	2.5
4	Res_54	2.5	2.5	2.5	32.375	32.375	32.375	32.375
5	Res_72	2.5	2.5	2.5	2.5	15.5	2.5	2.5
6	Res_77	2.5	2.5	2.5	2.5	2.5	2.5	2.5
7	Res_79	2.5	2.5	9	9	15.5	12.25	9
8	Res_89	2.5	4.125	5.75	5.75	9	12.25	2.5
9	Res_108	2.5	2.5	2.5	2.5	2.5	2.5	2.5
10	Res_33	3.3125	3.3125	2.5	32.375	66.125	38	26.75
11	Res_28	3.58333	3.58333	2.5	9	21.125	12.25	15.5
12	Res_55	4.125	2.5	15.5	47.375	66.125	47.375	38
13	Res_58	4.125	4.9375	2.5	38	32.375	32.375	26.75
14	Res_50	4.9375	7.0625	2.5	2.5	9	2.5	11.375
15	Res_70	5.1	2.5	2.5	32.375	32.375	26.75	26.75
16	Res_16	5.75	13.6562	12.25	51.125	38	47.375	38
17	Res_18	7.96875	8.1875	2.5	26.75	32.375	21.125	26.75
18	Res_38	7.96875	11.875	15.5	47.375	56.75	38	66.125
19	Res_84	9	6.5625	5.75	38	38	56.75	38
20	Res_85	9.8125	14.25	5.75	38	47.375	47.375	38
21	Res_12	13.4375	19.7188	21.125	47.375	38	32.375	47.375
22	Res_15	13.5833	13.3125	5.75	47.375	38	47.375	38
23	Res_17	16.6875	5.75	2.5	56.75	47.375	56.75	56.75
24	Res_86	17.4375	10.4062	2.5	2.5	32.375	2.5	2.5
25	Res_48	17.6562	30.0312	2.5	56.75	51.125	47.375	38
26	Res_19	18.6875	22.3125	15.5	47.375	47.375	32.375	38
27	Res_22	19.1875	3.3125	15.5	32.375	47.375	56.75	47.375
28	Res_35	20.6875	12.4062	9	32.375	47.375	26.75	32.375
29	Res_41	21.3375	21.2312	2.5	2.5	5.75	5.75	2.5
30	Res_103	21.5	23.25	21.125	2.5	2.5	2.5	2.5
31	Res_67	21.6027	13.2188	2.5	5.75	2.5	12.25	2.5
32	Res_73	20.125	13	2.5	2.5	2.5	2.5	2.5
33	Res_9	28.5312	11.7625	15.5	47.375	47.375	47.375	38
34	Res_14	30.4062	26.3125	15.5	38	47.375	32.375	38
35	Res_27	38.2188	29.2812	2.5	38	38	47.375	56.75
	Golden Promise	50	50	47.2667	55.25	47.375	42.375	56.75
	Ingrid	57.7008	53.1049	54.5	56.75	56.75	66.125	32.375
	Morex	67.12	56.2	63.9075	57.375	47.375	58	47.375
1The accessions were previously re-named according to number of tested barley accessions. The accession with the ID of Res_73 is corresponded to ‘HOR2573 which highlighted in gray.
Three European isolates (78P, D12-12 and CH 4.8)
Four Israeli isolates (35, 69, 148 and 289)
